# Supplementary material
Source: PubMed Central journal article supplement (PMC3567665)

## **Supplemental Information**

### **SUPPLEMENTARY FIGURE 1.**

**Raw data for analysis of dependence of SRY nuclear import on hsc70.** Raw data for the image analysis of *in vitro* nuclear transport assays for GFP-SRY-HMG wild type (wt) in the absence and presence of hsc70 antibodies conducted in Figure 1. Results represent the mean  $\pm$  SEM from a single typical experiment of raw fluorescence values for Fn-Fb and Fc-Fb, with each data point representing  $> 3$  separate measurements. Curves were fitted (3 parameter sigmoidal) using the SigmaPlot software.

### **SUPPLEMENTARY FIGURE 2.**

**Raw data for densitometric analysis of hsc70 binding to the SRY/CaM complex in Ca<sup>2+</sup>-dependent fashion.** Raw data for the densitometric analysis of immunoprecipitation assays conducted in Figure 3B to calculate the amount of hsc70 bound relative to GFP in the absence and presence of Ca<sup>2+</sup> for GFP fusion proteins, as indicated.

# Supplementary Figure 1

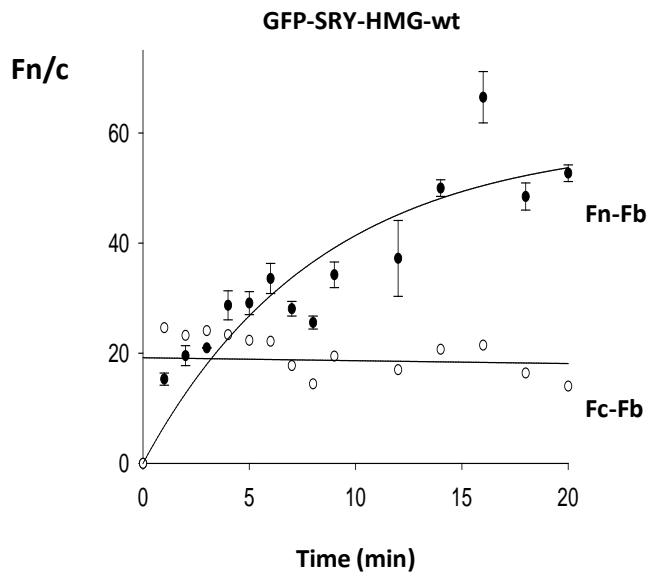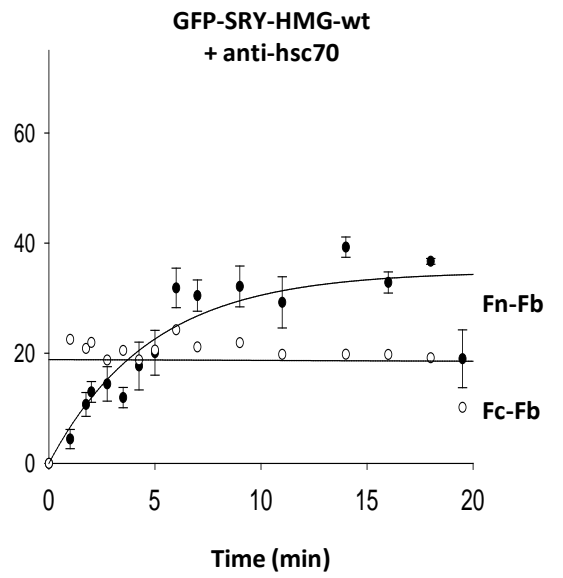

## Supplementary Figure 2

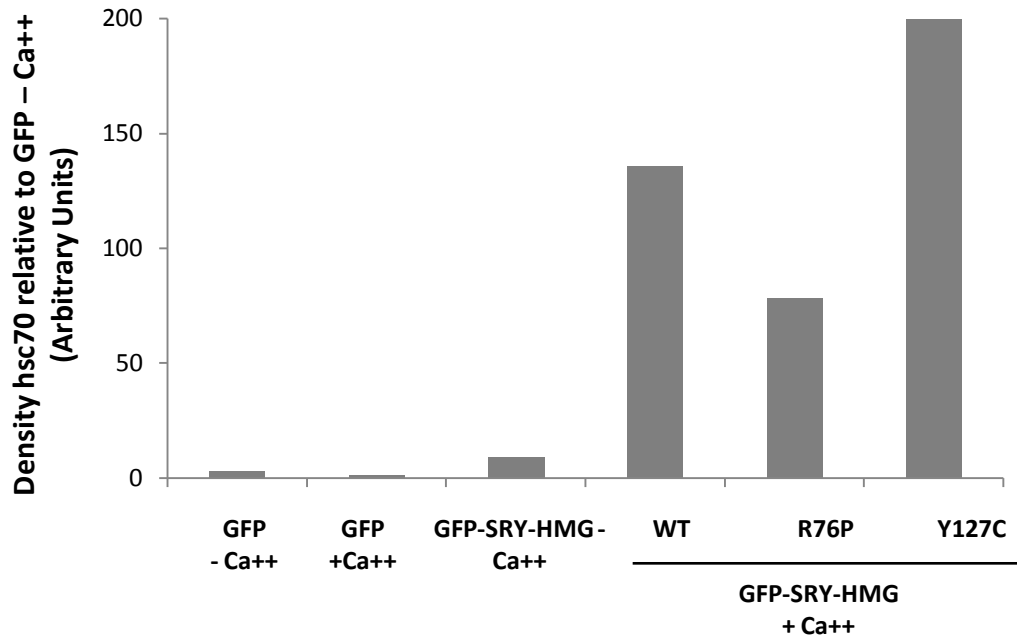

Supplement: supp_M112.436741_jbc.M112.436741-1.pdf [file supp_M112.436741_jbc.M112.436741-1.pdf]
